# Supplementary material
Source: publisher site journal article supplement (https://www.spandidos-publications.com/779/downloadSupplementary)
Supplement: Supplementary file 1 [file downloadSupplementary]

Table SXII. GO analysis for mRNAs in hsa\_circ\_0043278-microRNA-mRNA axis.

| ID         | Description                                                                                                         | GeneRatio | P-value  |
|------------|---------------------------------------------------------------------------------------------------------------------|-----------|----------|
| GO:0000982 | Transcription factor activity, RNA polymerase II proximal promoter sequence-specific DNA binding                    | 39/634    | 5.23E-08 |
| GO:0001227 | Transcriptional repressor activity, RNA polymerase II transcription regulatory region sequence-specific DNA binding | 24/634    | 4.12E-06 |
| GO:0000987 | Proximal promoter sequence-specific DNA binding                                                                     | 36/634    | 7.90E-06 |
| GO:0000978 | RNA polymerase II proximal promoter sequence-specific DNA binding                                                   | 34/634    | 2.29E-05 |
| GO:0001077 | Transcriptional activator activity, RNA polymerase II proximal promoter sequence-specific DNA binding               | 24/634    | 8.09E-05 |
| GO:0004721 | Phosphoprotein phosphatase activity                                                                                 | 18/634    | 8.81E-05 |
| GO:0043021 | Ribonucleoprotein complex binding                                                                                   | 14/634    | 0.00011  |
| GO:0001228 | Transcriptional activator activity, RNA polymerase II transcription regulatory region sequence-specific DNA binding | 31/634    | 0.000126 |
| GO:0003727 | Single-stranded RNA binding                                                                                         | 11/634    | 0.000137 |
| GO:0019787 | Ubiquitin-like protein transferase activity                                                                         | 33/634    | 0.000241 |
| GO:0046332 | SMAD binding                                                                                                        | 10/634    | 0.000315 |
| GO:0031625 | Ubiquitin protein ligase binding                                                                                    | 24/634    | 0.000378 |
| GO:0050839 | Cell adhesion molecule binding                                                                                      | 33/634    | 0.000454 |
| GO:0019888 | Protein phosphatase regulator activity                                                                              | 10/634    | 0.000485 |
| GO:0003713 | Transcription coactivator activity                                                                                  | 24/634    | 0.000546 |

|            |                                                                                                             |        |          |
|------------|-------------------------------------------------------------------------------------------------------------|--------|----------|
| GO:0003730 | Mrna 3'-UTR binding                                                                                         | 9/634  | 0.000583 |
| GO:0043022 | Ribosome binding                                                                                            | 8/634  | 0.000585 |
| GO:0001078 | Transcriptional repressor activity, RNA<br>polymerase II proximal promoter<br>sequence-specific DNA binding | 14/634 | 0.000593 |
| GO:0044389 | Ubiquitin-like protein ligase binding                                                                       | 24/634 | 0.000711 |
| GO:0008013 | Beta-catenin binding                                                                                        | 10/634 | 0.000725 |
| GO:0004842 | Ubiquitin-protein transferase activity                                                                      | 30/634 | 0.000855 |
| GO:0001046 | Core promoter sequence-specific DNA binding                                                                 | 10/634 | 0.001155 |

GO, Gene Ontology; circ, circular RNA; UTR, untranslated region; hsa, Homo sapiens.
